# Supplementary material
Source: Research Square preprint supplement (doi:10.21203/rs.3.rs-9501257/v1)
Supplement: Supplementary file 1 [file 50747a12be5adad4b4b6d085.pdf]

# Medicine → Technology Career Study

This is a research study and by completing this form you are consenting to participate.

We will not collect any personally identifiable information (*name, email, etc.*). The data gathered will be aggregated and the results will be reported in a summarized format.

We're excited to understand your journey from medicine into technology and hope these resources can be used to help the next generation of physicians. The information you provide will consider your insights and advice as well as help us understand the current state of physicians working in the technological sector.

Expected time commitment: 10-15 minutes

For questions, address correspondence to: [bjt57@georgetown.edu](mailto:bjt57@georgetown.edu)

\* Indicates required question

## RESPONSES TO THIS SURVEY ARE ANONYMOUS AND CONFIDENTIAL

You will be provided questions about your career experience with medical technology. You may be as specific as you prefer when describing your role. The individual content of this survey will not be shared.

Your participation is entirely voluntary and very much appreciated.

### Demographics

1. Age \*

Mark only one oval.

- 20 - 30 years old
- 31 - 40 years old
- 41 - 50 years old
- 51 - 60 years old
- > 60 years old

## 2. Sex \*

Mark only one oval.

- Male
- Female
- Prefer not to say

## 3. What terminal degree(s) do you have? \*

Check all that apply.

- MD
- DO
- MBBS
- MS / MA
- MBA
- MPH
- PhD
- PsyD
- JD
- PharmD
- MPA
- NP / DNP
- Other: \_\_\_\_\_

## 4. What is your medical specialty? \*

*Check all that apply.*

- Allergy and Immunology
- Anesthesiology
- Dermatology
- Emergency Medicine
- Family Medicine
- Internal medicine: General
- Internal medicine: Cardiology
- Internal medicine: Endocrinology
- Internal medicine: Gastrology
- Internal medicine: Geriatrics
- Internal medicine: Hospice and Palliative Care
- Internal medicine: Infectious Disease
- Internal medicine: Nephrology
- Internal medicine: Pulmonology
- Internal medicine: Rheumatology
- Internal medicine: Hematology/Oncology
- Interventional Radiology
- Medical Genetics
- Neurological Surgery
- Neurology
- Nuclear Medicine
- Obstetrics/Gynecology
- Ophthalmology
- Orthopedics
- Otolaryngology (ENT)
- Pathology
- Pediatrics: General
- Pediatrics: Adolescent Medicine
- Pediatrics: Cardiology
- Pediatrics: Neonatology
- Pediatric Cardiology
- Pediatrics: Critical Care
- Pediatrics: Endocrinology
- Pediatrics: Gastroenterology

- Pediatrics: Hematology/Oncology
- Pediatrics: Nephrology
- Pediatrics: Pulmonology
- Pediatrics: Rheumatology
- Physical Medicine and Rehabilitation
- Psychiatry
- Radiology
- Surgery: General
- Surgery: Plastics
- Surgery: Thoracic
- Surgery: Urological
- Surgery: Vascular
- Other: \_\_\_\_\_

Professional Roles

5. All former and current medical title(s) \*  
*e.g., cardiology fellow, pediatrics residency director, attending physician*

---

---

---

---

---

6. All former and current non-medical title(s) \*  
*e.g., senior product manager, medical lead, VP for health innovation*

---

---

---

---

---

7. Which of the following describes the company or setting for your current \* or last medical technology role(s)?

*Check all that apply.*

- Big tech company
- Early stage start-up
- Mid/late stage start-up
- Insurance company
- Pharmaceutical company
- Medical device company
- Government role
- Non-profit role
- Health software (including EHR)
- Biotechnology or instrumentation
- Technology role in a health system
- Academic research
- Board member
- Advisor
- Consultant
- Investor
- Founder/entrepreneur
- Other: \_\_\_\_\_

8. Which of the following describes your current or last role(s) in medical \* technology?

*Check all that apply.*

- Subject Matter Expert (providing clinical expertise)
- Clinical operations oversight
- Product Development
- Data Science
- Sales/business development
- Clinical Informatics
- Other: \_\_\_\_\_

- 9. In one sentence, what is your current work in medical or medically-adjacent technology? \*

*You will have space to provide more details in the next section*

---

- 10. How many years have you been working in medical technology? \*

*Mark only one oval.*

- 1-year or less
- 2 - 3 years
- 4 - 5 years
- 6 - 7 years
- 8 - 9 years
- 10-years or more

- 11. Of your total work time (clinical + non-clinical), what is the percentage you spend in your technological role? \*

e.g., non-clinical, non-academic, and non-administrative

*Mark only one oval.*

1 2 3 4 5 6 7 8 9 10

---

10%            100%

---

12. Do you still see patients and, if so, in what capacity? \*

*Mark only one oval.*

- I do not currently see patients
- Full time, hospital/clinic employed
- Part time, hospital/clinic employed
- Full time, private practice
- Part time, private practice
- Full time, volunteer
- Part time, volunteer
- Locum Tenens
- Other:  
—

## Perspective

13. How much demand is there in your technological field or line of work for more physicians? \*

*Mark only one oval.*

- No demand
- Little demand
- Some demand
- Lots of demand
- Overwhelming demand
- Unsure

14. Do you think the opportunities for non-traditional careers in medicine have increased or decreased in the last 5 years? \*

*Mark only one oval.*

- Decreased a lot
- Decreased some
- No change
- Increased some
- Increased a lot
- Unsure

15. What motivated you to transition from clinical practice to medical technology? \*

*Check all that apply.*

- Went into medicine with plans to enter the space
- New interests outside medicine
- Monetary incentives
- Improved work-life balance
- Burnout
- Work variety
- Diminished interest in clinical practice
- More engaging work
- Greater impact on others
- Desire for additional autonomy
- Non-clinical overhead (e.g., documentation, prior-authorizations)
- Acquiring new technical skills
- Colleagues in the field
- Concerns about future of specialty/clinical medicine
- Physical limitations or health reasons affecting clinical work
- Desire for a more collaborative, team-based environment
- Geographic relocation needs/desires
- Other: \_\_\_\_\_

16. What were the most significant hurdles you encountered as you transitioned to work outside medicine? \*

*Check all that apply.*

- Not knowing where to start
- Translating clinical skills/experience effectively for non-clinical roles
- Difficulty identifying suitable job roles or companies
- Building a professional network outside of medicine
- Navigating the hiring process (resumes, interviews, negotiations)
- Adjusting to culture and work politics
- Loss of professional identity
- Dealing with feelings of guilt or obligation regarding leaving patient care
- Concerns about compensation
- Managing existing financial obligations
- Acquiring necessary technical skills
- Adjusting to being in a junior/learning role
- Lack of business acumen (e.g., finance, marketing, strategy)
- Adapting to different work paces and project timelines
- Negative perceptions or lack of support from colleagues
- Finding relevant mentors
- Other: \_\_\_\_\_

17. [optional] What advice do you have for those hoping to work in medical technology?

*Think about what you usually share in 1:1 career advice conversations.*

---

---

---

---

---

- 18. [optional] Are there any resources and/or tools you wish you had when you were making your transition to make the process easier/smoothen for you?

---

---

---

---

---

- 19. [optional] What are the best resources available for those hoping to work in medical technology?

*Please also include any books, articles, or other references that you recommend to people who want to do a similar career as you.*

---

---

---

---

---

- 20. [optional] Have you noticed any changes in the type of work being done by/available to physicians in the med tech sector since your began your career?

---

---

---

---

---

21. [optional] Please use this space to provide any other thoughts or comments you have that were not included above.

---

---

---

---

---

Thank you for completing this survey

We appreciate your help in supporting the new generation of physicians. Your contribution will have direct impact through the recommendations compiled from this study.

**If you'd like to help more, the best way would be to share this survey with other physicians in technology.** This could be coworkers, colleagues, friends, or via social media. If you'd like to share this form, please use this link for others:

<https://forms.gle/mjpwM1tZ6tQAbjiu8>

Thank you again.

---

This content is neither created nor endorsed by Google.

Google Forms
