# Supplementary material
Source: Research Square preprint supplement (doi:10.21203/rs.3.rs-9501257/v1)

**Hierarchical Clustering Dendrogram of Physician Phenotypes**


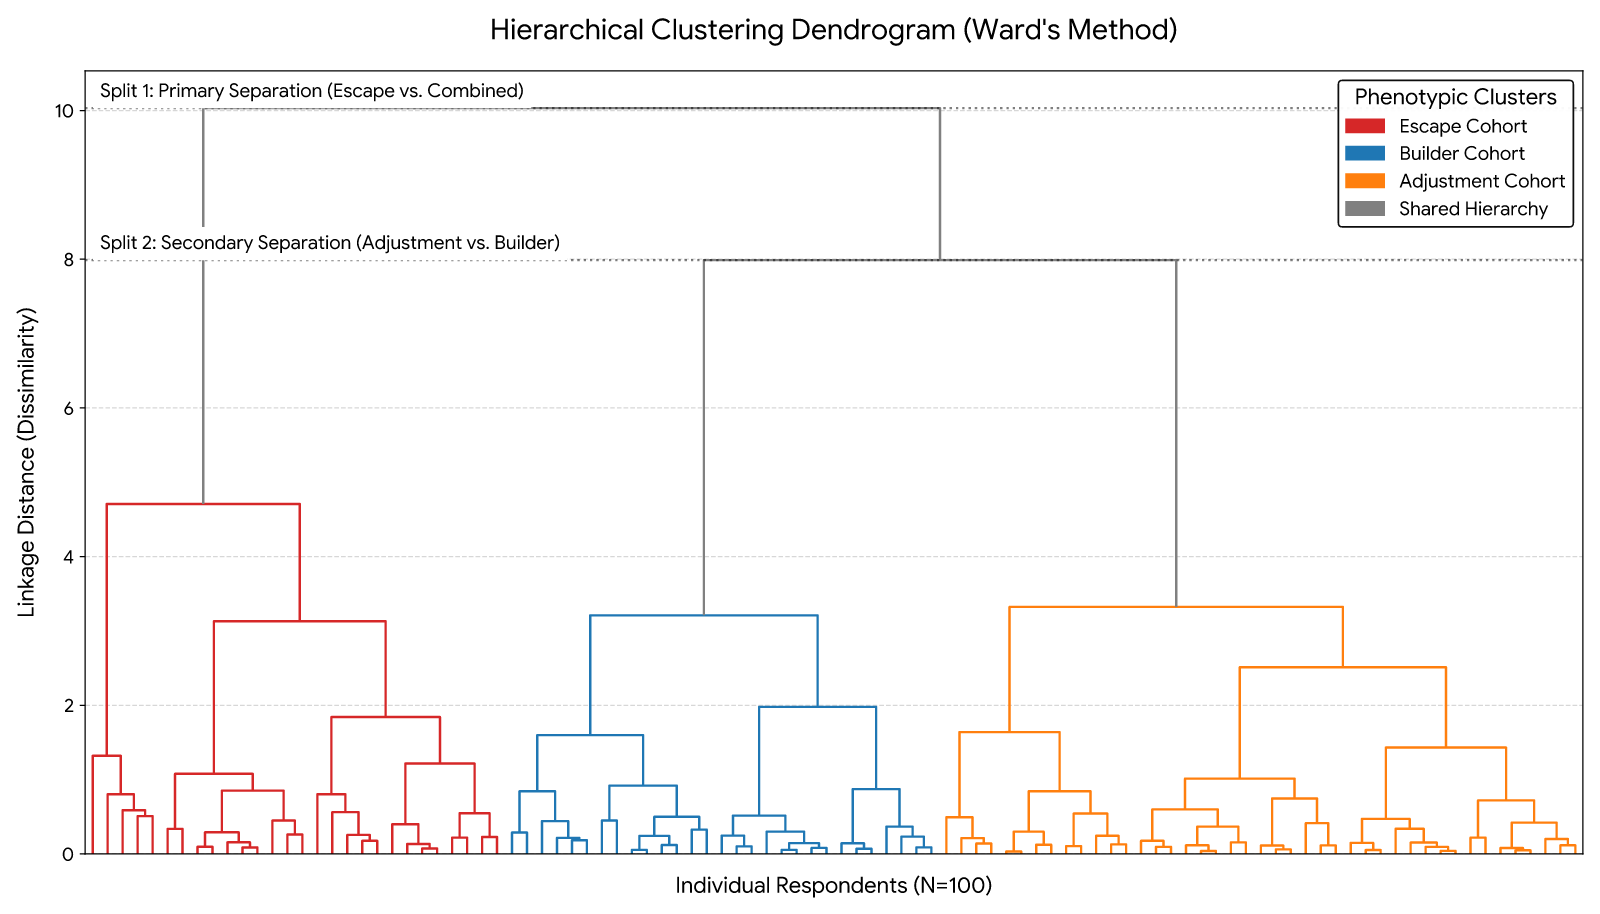


*Footer*

Supplement: Supplementary file 2 [file 765999541e2ae1bee01f4a7a.docx]
